# Supplementary material for: Surface modification of a cobalt-free layered Li[Li0.2Fe0.1Ni0.15Mn0.55]O2 oxide with the FePO4/Li3PO4 composite as the cathode for lithium-ion batteries
Source: Royal Society of Chemistry journal article supplement (doi:10.1039/c4ta07094a), 2015-01-01
Supplement: c4ta07094a1.pdf [file c4ta07094a1.pdf]

## Supporting Information

# Surface modification of cobalt-free layered $\text{Li}[\text{Li}_{0.2}\text{Fe}_{0.1}\text{Ni}_{0.15}\text{Mn}_{0.55}]\text{O}_2$ oxide with $\text{FePO}_4/\text{Li}_3\text{PO}_4$ composite as the cathode for lithium-ion batteries

Feng Wu<sup>a,b</sup>, Xiaoxiao Zhang<sup>a</sup>, Taolin Zhao<sup>a</sup>, Li Li<sup>a,b\*</sup>, Man Xie<sup>a</sup> and Renjie Chen<sup>a,b\*</sup>

<sup>a</sup> Beijing Key Laboratory of Environmental Science and Engineering, School of Chemical Engineering and the Environment, Beijing Institute of Technology, Beijing 100081, P. R.China.

<sup>b</sup> National Development Center for High Technology Green Materials, Beijing 100081, P. R.China.

Corresponding author: E-mail address: [lily863@bit.edu.cn](mailto:lily863@bit.edu.cn)

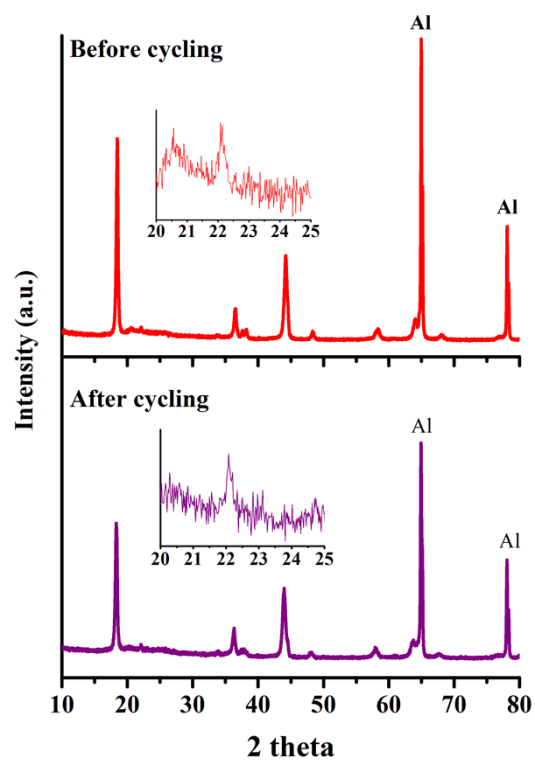

Fig. S1 XRD patterns of FP-3 electrode before cycling and after 100 cycles at 5C.

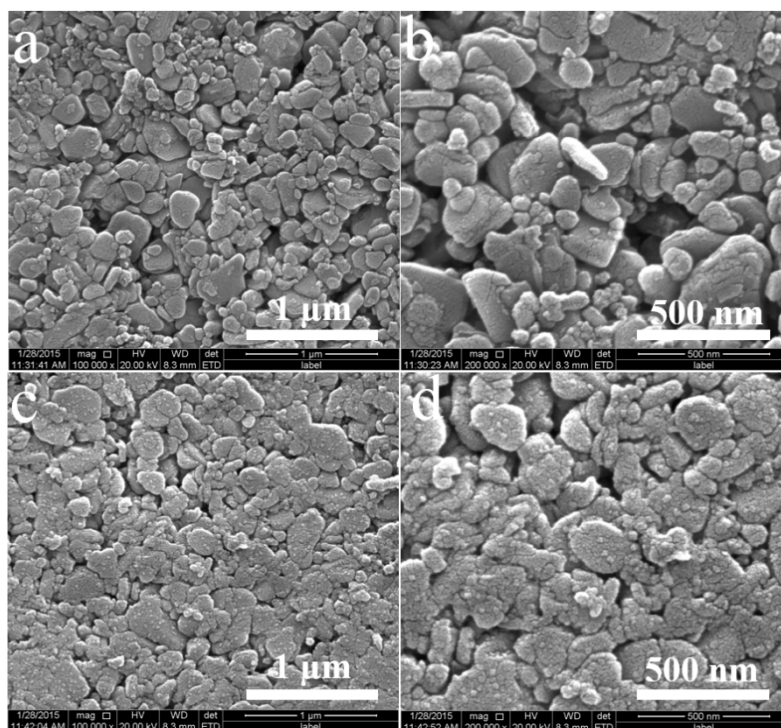

Fig. S2 SEM images of FP-3 electrode before cycling (a, b) and after 100 cycles at 5C(c, d).

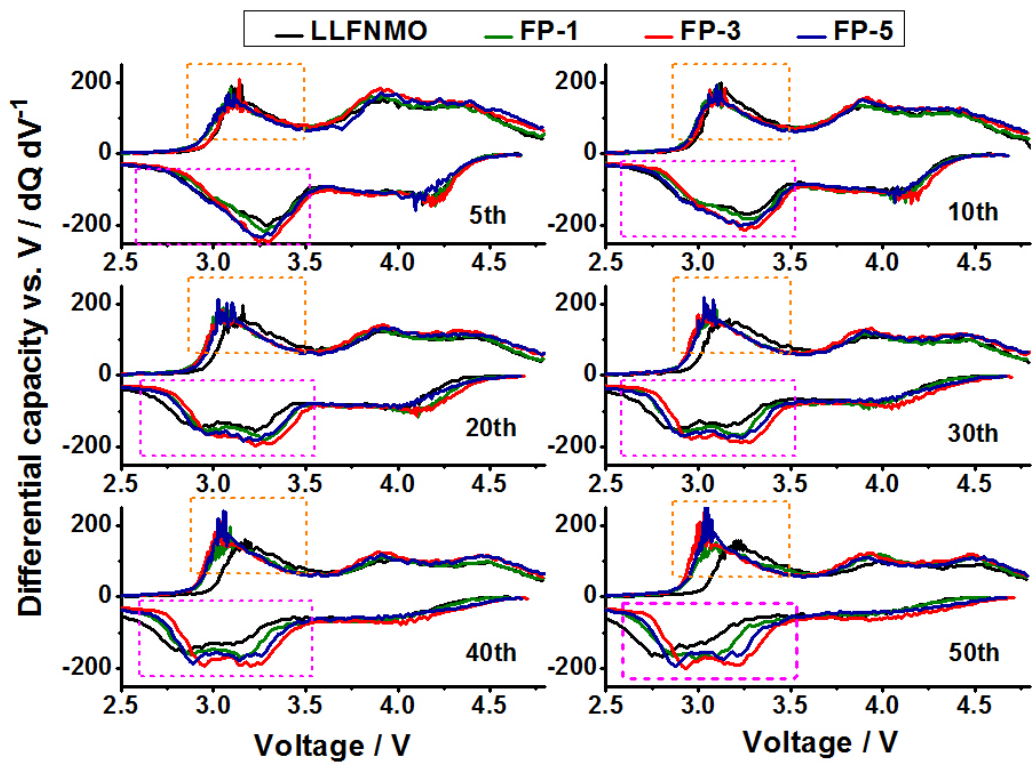

Fig. S3 Differential capacity vs. voltage curves of different cycles at 0.2C of LLFNMO and FePO<sub>4</sub>/Li<sub>3</sub>PO<sub>4</sub> coated samples with different coating amounts.

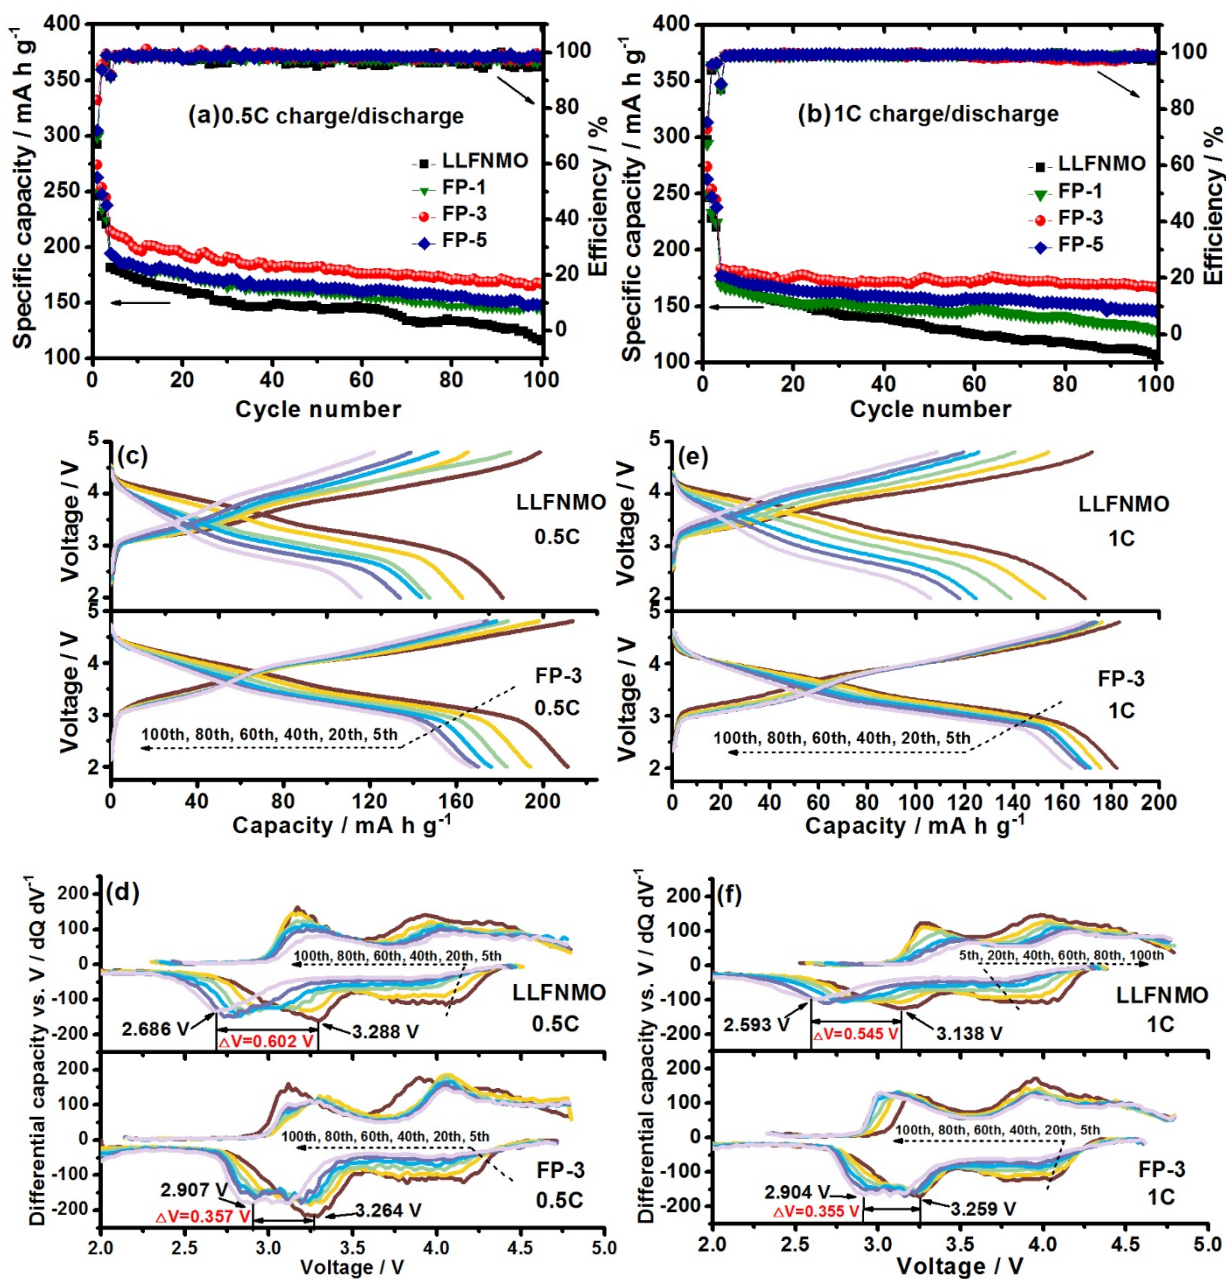

**Fig. S4** Cycling performances of all the samples at 0.5C (a) and 1C (b), charge/discharge profiles of different cycles and the corresponding differential capacities curves of LLFNMO and FP-3 at 0.5C (c, d) and 1C (e, f).

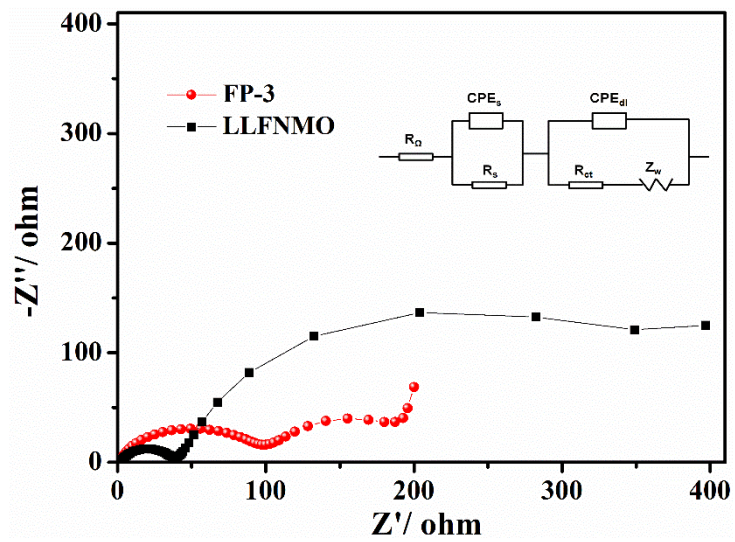

**Fig. S5** Nyquist plots of LLFNMO and FP-3 after cycling 100 cycles at 5C. The test voltage is 4 V at charged state.
